# Supplementary material
Source: PubMed Central journal article supplement (PMC7965849)
Supplement: NIHMS1668489-supplement-Supplementary_figure_1___table_1_5-7.pdf [file NIHMS1668489-supplement-Supplementary_figure_1___table_1_5-7.pdf]

---

**Supplementary information**

---

**The NK cell granule protein NKG7 regulates  
cytotoxic granule exocytosis and  
inflammation**

---

In the format provided by the  
authors and unedited

# Supplementary Figure 1

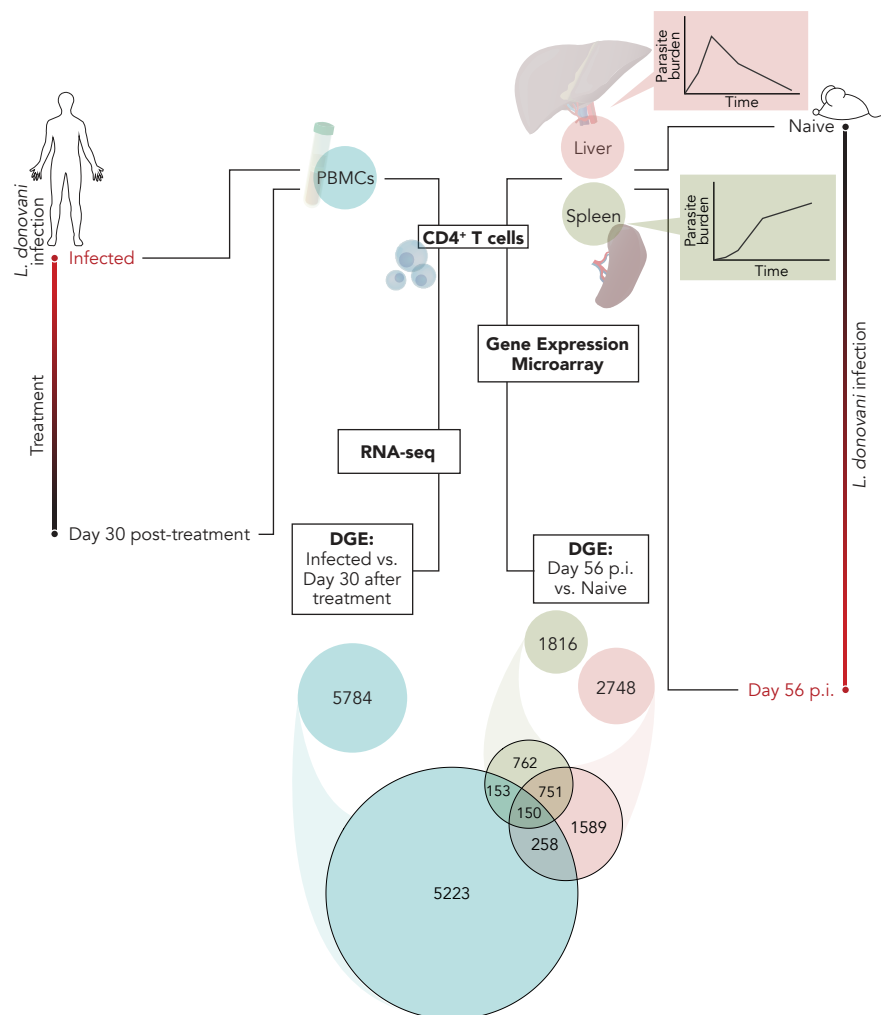

**Supplementary Figure 1 Defining transcriptomic signature of CD4<sup>+</sup> T cells during *Leishmania donovani* infection.** Schematic showing the approach taken to identify transcriptomic signatures of CD4<sup>+</sup> T cells in the spleen ( $n = 5$  biological replicates) and liver ( $n = 4$  naive replicates, each pooled from 4 mice, and 5 infected biological replicates) of mice at day 56 post-infection (p.i.) that are relevant in *L. donovani*-infected patients before and 30 days post-drug treatment ( $n = 9$ ).

**Supplementary Table 1. Clinical data from visceral leishmaniasis patients**

| <b>Variables</b>                                           | <b>Endemic Controls</b> | <b>Visceral Leishmaniasis</b>  |
|------------------------------------------------------------|-------------------------|--------------------------------|
| <i>n</i>                                                   | 14                      | 23                             |
| <b>Age (years)</b>                                         | 31.14±7.94 (29)         | 26.17±17.79 (22) <sup>a</sup>  |
| <b>Sex (M/F)</b>                                           | 08/06                   | 13/10                          |
| <b>Duration of illness (days)</b>                          | N/A                     | 26.82±17.47 (21)               |
| <b>WBC (x 10<sup>3</sup>/mm<sup>3</sup>, day 0)</b>        | N/D                     | 3926.08±1884.43 (3400)         |
| <b>WBC (x 10<sup>3</sup>/mm<sup>3</sup>, day 30)</b>       | N/D                     | 7795.65±2618.72 (7800)         |
| <b>Platelets (x 10<sup>3</sup>/mm<sup>3</sup>, day 0)</b>  | N/D                     | 110260.87±58182.49(98000)      |
| <b>Platelets (x 10<sup>3</sup>/mm<sup>3</sup>, day 30)</b> | N/D                     | 212608.70±79014.81<br>(240000) |
| <b>Splenic enlargement (cm, day 0)</b>                     | N/A                     | 5.04±3.52 (4)                  |
| <b>Splenic enlargement (cm, day 30)</b>                    | N/A                     | 1.17±1.4 (0)                   |

*Abbreviations: N/A, not applicable; N/D, not done.*

<sup>a</sup>*The data is shown as mean ± SD of aggregated data, and median values are included in parentheses.*

**Supplementary Table 5. Composition of in vitro polarisation cocktails**

| Condition           | Composition              | Company      | Clone    | Concentration (1x) |
|---------------------|--------------------------|--------------|----------|--------------------|
| <b>Th0</b>          | $\alpha$ -CD3 $\epsilon$ | BioLegend*   | 145-2C11 | 4 $\mu$ g/ml       |
|                     | $\alpha$ -CD28           | BioLegend*   | 37.51    | 2 $\mu$ g/ml       |
|                     | rmIL-2                   | BioLegend*   | -        | 20 ng/ml           |
| <b>Th1</b>          | $\alpha$ -CD3 $\epsilon$ | BioLegend*   | 145-2C11 | 4 $\mu$ g/ml       |
|                     | $\alpha$ -CD28           | BioLegend*   | 37.51    | 2 $\mu$ g/ml       |
|                     | rmIL-2                   | BioLegend*   | -        | 20 ng/ml           |
|                     | rmIL-12 (p70)            | BioLegend*   | -        | 10 ng/ml           |
|                     | $\alpha$ -IL-4           | BioLegend*   | 11B11    | 10 $\mu$ g/ml      |
| <b>Th1 + rIL-27</b> | $\alpha$ -CD3 $\epsilon$ | BioLegend*   | 145-2C11 | 4 $\mu$ g/ml       |
|                     | $\alpha$ -CD28           | BioLegend*   | 37.51    | 2 $\mu$ g/ml       |
|                     | rmIL-2                   | BioLegend*   | -        | 20 ng/ml           |
|                     | rmIL-12 (p70)            | BioLegend*   | -        | 10 ng/ml           |
|                     | $\alpha$ -IL-4           | BioLegend*   | 11B11    | 10 $\mu$ g/ml      |
|                     | rmIL-27                  | BioLegend*   | -        | 100 ng/ml          |
| <b>Tr1</b>          | $\alpha$ -CD3 $\epsilon$ | BioLegend*   | 145-2C11 | 4 $\mu$ g/ml       |
|                     | $\alpha$ -CD28           | BioLegend*   | 37.51    | 2 $\mu$ g/ml       |
|                     | rmIL-2                   | BioLegend*   | -        | 20 ng/ml           |
|                     | rmIL-27                  | BioLegend*   | -        | 100ng/ml           |
| <b>Th2</b>          | $\alpha$ -CD3 $\epsilon$ | BioLegend*   | 145-2C11 | 4 $\mu$ g/ml       |
|                     | $\alpha$ -CD28           | BioLegend*   | 37.51    | 2 $\mu$ g/ml       |
|                     | rmIL-2                   | BioLegend*   | -        | 20 ng/ml           |
|                     | rmIL-4                   | BioLegend*   | -        | 40 ng/ml           |
|                     | $\alpha$ -IFN- $\gamma$  | BioLegend*   | XMG1.2   | 10 $\mu$ g/ml      |
| <b>Th17</b>         | $\alpha$ -CD3 $\epsilon$ | BioLegend*   | 145-2C11 | 4 $\mu$ g/ml       |
|                     | $\alpha$ -CD28           | BioLegend*   | 37.51    | 2 $\mu$ g/ml       |
|                     | rmIL-2                   | BioLegend*   | -        | 20 ng/ml           |
|                     | rmIL-6                   | BioLegend*   | -        | 20 ng/ml           |
|                     | rmIL-1 $\beta$           | eBioscience# | -        | 10 ng/ml           |

|                              |         |                          |          |           |
|------------------------------|---------|--------------------------|----------|-----------|
|                              | rmIL-23 | eBioscience <sup>#</sup> | -        | 10 ng/ml  |
|                              | rm-TNF  | eBioscience <sup>#</sup> | -        | 10 ng/ml  |
|                              | rm-TGFβ | BioLegend <sup>*</sup>   | -        | 1 ng/ml   |
|                              | α-IFN-γ | BioLegend <sup>*</sup>   | XMG1.2   | 10 μg/ml  |
|                              | α-IL-4  | BioLegend <sup>*</sup>   | 11B11    | 10 μg/ml  |
| <b>T<sub>r</sub>1 + TGFβ</b> | α-CD3ε  | BioLegend <sup>*</sup>   | 145-2C11 | 4 μg/ml   |
|                              | α-CD28  | BioLegend <sup>*</sup>   | 37.51    | 2 μg/ml   |
|                              | rmIL-2  | BioLegend <sup>*</sup>   | -        | 20 ng/ml  |
|                              | rmIL-27 | BioLegend <sup>*</sup>   | -        | 100 ng/ml |
|                              | rm-TGFβ | BioLegend <sup>*</sup>   | -        | 0.5 μg/ml |

Based on methods previously described in <sup>22</sup>. T<sub>H</sub>, T helper; T<sub>reg</sub>, regulatory T cell; α, purified monoclonal anti-mouse; rmIL, recombinant mouse interleukin; \* BioLegend, San Diego CA, USA; # eBioscience, Thermo Fisher Scientific, Waltham MA, USA

**Supplementary Table 6. Frequencies of immune cell subsets in WT versus *Nkg7*<sup>-/-</sup> mice**

| Organ                                                                                                                                                                                                | Cell type                                                                                                                                                                         | WT             | <i>Nkg7</i> <sup>-/-</sup> | Mann–Whitney test,<br><i>p</i> value |
|------------------------------------------------------------------------------------------------------------------------------------------------------------------------------------------------------|-----------------------------------------------------------------------------------------------------------------------------------------------------------------------------------|----------------|----------------------------|--------------------------------------|
| Lung                                                                                                                                                                                                 | <b>γδ T cells</b>                                                                                                                                                                 |                |                            |                                      |
|                                                                                                                                                                                                      | CD45 <sup>+</sup> TCRβ <sup>-</sup><br>TCRγ/δ <sup>+</sup>                                                                                                                        | 1.155 ± 0.293  | 1.450 ± 0.272              | 0.4127                               |
|                                                                                                                                                                                                      | <b>NK cells</b>                                                                                                                                                                   |                |                            |                                      |
|                                                                                                                                                                                                      | CD45 <sup>+</sup> TCRγ/δ <sup>-</sup><br>TCRβ <sup>-</sup> NK1.1 <sup>+</sup>                                                                                                     | 7.423 ± 1.510  | 8.334 ± 2.280              | 0.4127                               |
|                                                                                                                                                                                                      | <b>CD4<sup>+</sup> T cells</b>                                                                                                                                                    |                |                            |                                      |
|                                                                                                                                                                                                      | CD45 <sup>+</sup> TCRγ/δ <sup>-</sup><br>NK1.1 <sup>-</sup> TCRβ <sup>+</sup> CD8 <sup>-</sup><br>CD4 <sup>+</sup>                                                                | 14.130 ± 2.364 | 12.960 ± 2.300             | 0.4127                               |
|                                                                                                                                                                                                      | <b>CD8<sup>+</sup> T cells</b>                                                                                                                                                    |                |                            |                                      |
|                                                                                                                                                                                                      | CD45 <sup>+</sup> TCRγ/δ <sup>-</sup><br>NK1.1 <sup>-</sup> TCRβ <sup>+</sup> CD4 <sup>-</sup><br>CD8 <sup>+</sup>                                                                | 8.293 ± 1.625  | 8.886 ± 2.009              | 0.9048                               |
|                                                                                                                                                                                                      | <b>B cells</b>                                                                                                                                                                    |                |                            |                                      |
|                                                                                                                                                                                                      | CD45 <sup>+</sup> TCRγ/δ <sup>-</sup><br>NK1.1 <sup>-</sup> TCRβ <sup>-</sup> B220 <sup>+</sup>                                                                                   | 28.580 ± 2.363 | 25.660 ± 4.281             | 0.3095                               |
|                                                                                                                                                                                                      | <b>Macrophages</b>                                                                                                                                                                |                |                            |                                      |
|                                                                                                                                                                                                      | CD45 <sup>+</sup> TCRγ/δ <sup>-</sup><br>NK1.1 <sup>-</sup> TCRβ <sup>-</sup> B220 <sup>-</sup><br>MHCII <sup>+</sup> CD64 <sup>+</sup>                                           | 6.788 ± 1.438  | 6.298 ± 1.756              | >0.9999                              |
|                                                                                                                                                                                                      | <b>cDCs</b>                                                                                                                                                                       |                |                            |                                      |
|                                                                                                                                                                                                      | CD45 <sup>+</sup> TCRγ/δ <sup>-</sup><br>NK1.1 <sup>-</sup> TCRβ <sup>-</sup> B220 <sup>-</sup><br>CD64 <sup>-</sup> MHCII <sup>hi</sup><br>CD11c <sup>+</sup>                    | 1.383 ± 0.217  | 1.718 ± 0.478              | 0.4127                               |
|                                                                                                                                                                                                      | <b>Neutrophils</b>                                                                                                                                                                |                |                            |                                      |
|                                                                                                                                                                                                      | CD45 <sup>+</sup> TCRγ/δ <sup>-</sup><br>NK1.1 <sup>-</sup> TCRβ <sup>-</sup> B220 <sup>-</sup><br>CD64 <sup>-</sup> CD11c <sup>-</sup> Ly-<br>6G <sup>+</sup> Ly-6C <sup>+</sup> | 0.923 ± 0.175  | 1.692 ± 0.495              | 0.0635                               |
| <b>Monocytes</b>                                                                                                                                                                                     |                                                                                                                                                                                   |                |                            |                                      |
| CD45 <sup>+</sup> TCRγ/δ <sup>-</sup><br>NK1.1 <sup>-</sup> TCRβ <sup>-</sup> B220 <sup>-</sup><br>CD64 <sup>-</sup> CD11c <sup>-</sup> Ly-<br>6G <sup>-</sup> CD11b <sup>+</sup> Ly-6C <sup>+</sup> | 5.090 ± 2.385                                                                                                                                                                     | 3.098 ± 0.976  | 0.2857                     |                                      |

|                                                                                                                                                                                                                          |                                                                                                                                                                                    |                |                |          |
|--------------------------------------------------------------------------------------------------------------------------------------------------------------------------------------------------------------------------|------------------------------------------------------------------------------------------------------------------------------------------------------------------------------------|----------------|----------------|----------|
| <b>Spleen</b>                                                                                                                                                                                                            | <b><math>\gamma\delta</math> T cells</b>                                                                                                                                           |                |                |          |
|                                                                                                                                                                                                                          | CD45 <sup>+</sup> TCR $\gamma/\delta$ <sup>-</sup><br>TCR $\gamma/\delta$ <sup>+</sup>                                                                                             | 0.892 ± 0.100  | 1.060 ± 0.110  | 0.0635   |
|                                                                                                                                                                                                                          | <b>NK cells</b>                                                                                                                                                                    |                |                |          |
|                                                                                                                                                                                                                          | CD45 <sup>+</sup> TCR $\gamma/\delta$ <sup>-</sup><br>TCR $\beta$ <sup>-</sup> NK1.1 <sup>+</sup>                                                                                  | 2.790 ± 0.506  | 2.844 ± 0.688  | 0.6905   |
|                                                                                                                                                                                                                          | <b>CD4<sup>+</sup> T cells</b>                                                                                                                                                     |                |                |          |
|                                                                                                                                                                                                                          | CD45 <sup>+</sup> TCR $\gamma/\delta$ <sup>-</sup><br>NK1.1 <sup>-</sup> TCR $\beta$ <sup>+</sup> CD8 <sup>-</sup><br>CD4 <sup>+</sup>                                             | 17.780 ± 2.109 | 19.480 ± 0.850 | 0.2143   |
|                                                                                                                                                                                                                          | <b>CD8<sup>+</sup> T cells</b>                                                                                                                                                     |                |                |          |
|                                                                                                                                                                                                                          | CD45 <sup>+</sup> TCR $\gamma/\delta$ <sup>-</sup><br>NK1.1 <sup>-</sup> TCR $\beta$ <sup>+</sup> CD4 <sup>-</sup><br>CD8 <sup>+</sup>                                             | 9.754 ± 1.760  | 12.340 ± 1.276 | * 0.0476 |
|                                                                                                                                                                                                                          | <b>B cells</b>                                                                                                                                                                     |                |                |          |
|                                                                                                                                                                                                                          | CD45 <sup>+</sup> TCR $\gamma/\delta$ <sup>-</sup><br>NK1.1 <sup>-</sup> TCR $\beta$ <sup>-</sup> B220 <sup>+</sup>                                                                | 56.900 ± 3.152 | 52.560 ± 1.276 | * 0.0159 |
|                                                                                                                                                                                                                          | <b>Macrophages</b>                                                                                                                                                                 |                |                |          |
|                                                                                                                                                                                                                          | CD45 <sup>+</sup> TCR $\gamma/\delta$ <sup>-</sup><br>NK1.1 <sup>-</sup> TCR $\beta$ <sup>-</sup> B220 <sup>-</sup><br>F4/80 <sup>+</sup> CD64 <sup>+</sup>                        | 1.248 ± 0.357  | 1.634 ± 0.178  | 0.2222   |
|                                                                                                                                                                                                                          | <b>cDCs</b>                                                                                                                                                                        |                |                |          |
|                                                                                                                                                                                                                          | CD45 <sup>+</sup> TCR $\gamma/\delta$ <sup>-</sup><br>NK1.1 <sup>-</sup> TCR $\beta$ <sup>-</sup> B220 <sup>-</sup><br>CD64 <sup>-</sup> MHCII <sup>hi</sup><br>CD11c <sup>+</sup> | 0.544 ± 0.058  | 0.580 ± 0.085  | 0.4603   |
|                                                                                                                                                                                                                          | <b>Neutrophils</b>                                                                                                                                                                 |                |                |          |
| CD45 <sup>+</sup> TCR $\gamma/\delta$ <sup>-</sup><br>NK1.1 <sup>-</sup> TCR $\beta$ <sup>-</sup> B220 <sup>-</sup><br>CD64 <sup>-</sup> CD11c <sup>-</sup> Ly-<br>6G <sup>+</sup> Ly-6C <sup>+</sup>                    | 0.748 ± 0.344                                                                                                                                                                      | 0.546 ± 0.144  | 0.3175         |          |
| <b>Monocytes</b>                                                                                                                                                                                                         |                                                                                                                                                                                    |                |                |          |
| CD45 <sup>+</sup> TCR $\gamma/\delta$ <sup>-</sup><br>NK1.1 <sup>-</sup> TCR $\beta$ <sup>-</sup> B220 <sup>-</sup><br>CD64 <sup>-</sup> CD11c <sup>-</sup> Ly-<br>6G <sup>-</sup> CD11b <sup>+</sup> Ly-6C <sup>+</sup> | 0.076 ± 0.008                                                                                                                                                                      | 0.104 ± 0.017  | * 0.0159       |          |
| <b>Thymus</b>                                                                                                                                                                                                            | <b>CD4<sup>+</sup></b>                                                                                                                                                             |                |                |          |
|                                                                                                                                                                                                                          | CD45 <sup>+</sup> TCR $\gamma/\delta$ <sup>-</sup><br>NK1.1 <sup>-</sup> CD8 <sup>-</sup> CD4 <sup>+</sup>                                                                         | 8.584 ± 0.763  | 8.774 ± 1.278  | >0.9999  |

|                                                               |                                                              |                    |                    |           |
|---------------------------------------------------------------|--------------------------------------------------------------|--------------------|--------------------|-----------|
|                                                               | <b>CD8<sup>+</sup></b>                                       |                    |                    |           |
|                                                               | CD45 <sup>+</sup> TCR $\gamma$ / $\delta$ <sup>-</sup>       | 5.198 $\pm$ 1.420  | 3.940 $\pm$ 1.288  | 0.0952    |
|                                                               | NK1.1 <sup>-</sup> CD4 <sup>-</sup> CD8 <sup>+</sup>         |                    |                    |           |
|                                                               | <b>CD4<sup>+</sup> CD8<sup>+</sup></b>                       |                    |                    |           |
|                                                               | CD45 <sup>+</sup> TCR $\gamma$ / $\delta$ <sup>-</sup>       | 78.480 $\pm$ 1.806 | 80.680 $\pm$ 2.475 | 0.2222    |
|                                                               | NK1.1 <sup>-</sup> CD4 <sup>+</sup> CD8 <sup>+</sup>         |                    |                    |           |
| <b>Bone marrow</b>                                            | <b><math>\gamma</math><math>\delta</math> T cells</b>        |                    |                    |           |
|                                                               | CD45 <sup>+</sup> TCR $\beta$ <sup>-</sup>                   | 0.306 $\pm$ 0.042  | 0.486 $\pm$ 0.065  | ** 0.0079 |
|                                                               | TCR $\gamma$ / $\delta$ <sup>+</sup>                         |                    |                    |           |
|                                                               | <b>NK cells</b>                                              |                    |                    |           |
|                                                               | CD45 <sup>+</sup> TCR $\gamma$ / $\delta$ <sup>-</sup>       | 1.090 $\pm$ 0.171  | 1.116 $\pm$ 0.066  | >0.9999   |
|                                                               | TCR $\beta$ <sup>-</sup> NK1.1 <sup>+</sup>                  |                    |                    |           |
|                                                               | <b>CD4<sup>+</sup> T cells</b>                               |                    |                    |           |
|                                                               | CD45 <sup>+</sup> TCR $\gamma$ / $\delta$ <sup>-</sup>       | 0.500 $\pm$ 0.091  | 0.676 $\pm$ 0.105  | * 0.0317  |
|                                                               | NK1.1 <sup>-</sup> TCR $\beta$ <sup>+</sup> CD8 <sup>-</sup> |                    |                    |           |
|                                                               | CD4 <sup>+</sup>                                             |                    |                    |           |
|                                                               | <b>CD8<sup>+</sup> T cells</b>                               |                    |                    |           |
|                                                               | CD45 <sup>+</sup> TCR $\gamma$ / $\delta$ <sup>-</sup>       | 0.950 $\pm$ 0.219  | 1.448 $\pm$ 0.118  | ** 0.0079 |
|                                                               | NK1.1 <sup>-</sup> TCR $\beta$ <sup>+</sup> CD4 <sup>-</sup> |                    |                    |           |
|                                                               | CD8 <sup>+</sup>                                             |                    |                    |           |
|                                                               | <b>B cells</b>                                               |                    |                    |           |
| CD45 <sup>+</sup> TCR $\gamma$ / $\delta$ <sup>-</sup>        | 34.120 $\pm$ 5.591                                           | 25.960 $\pm$ 2.399 | * 0.0159           |           |
| NK1.1 <sup>-</sup> TCR $\beta$ <sup>-</sup> B220 <sup>+</sup> |                                                              |                    |                    |           |
| <b>Macrophages</b>                                            |                                                              |                    |                    |           |
| CD45 <sup>+</sup> TCR $\gamma$ / $\delta$ <sup>-</sup>        |                                                              |                    |                    |           |
| NK1.1 <sup>-</sup> TCR $\beta$ <sup>-</sup> B220 <sup>-</sup> | 8.412 $\pm$ 1.608                                            | 8.236 $\pm$ 1.378  | >0.9999            |           |
| Ly-6G <sup>-</sup> CD64 <sup>+</sup>                          |                                                              |                    |                    |           |
| F4/80 <sup>+</sup>                                            |                                                              |                    |                    |           |
| <b>Ly6C<sup>hi</sup> monocytes</b>                            |                                                              |                    |                    |           |
| CD45 <sup>+</sup> TCR $\gamma$ / $\delta$ <sup>-</sup>        |                                                              |                    |                    |           |
| NK1.1 <sup>-</sup> TCR $\beta$ <sup>-</sup> B220 <sup>-</sup> | 2.686 $\pm$ 0.411                                            | 3.064 $\pm$ 0.571  | 0.5476             |           |
| Ly-6G <sup>-</sup> CD64 <sup>-</sup>                          |                                                              |                    |                    |           |
| CD11b <sup>+</sup> Ly6C <sup>hi</sup>                         |                                                              |                    |                    |           |
| <b>Ly6C<sup>lo</sup> monocytes</b>                            |                                                              |                    |                    |           |
| CD45 <sup>+</sup> TCR $\gamma$ / $\delta$ <sup>-</sup>        |                                                              |                    |                    |           |
| NK1.1 <sup>-</sup> TCR $\beta$ <sup>-</sup> B220 <sup>-</sup> | 1.600 $\pm$ 0.169                                            | 1.826 $\pm$ 0.231  | 0.2063             |           |
| Ly-6G <sup>-</sup> CD64 <sup>-</sup>                          |                                                              |                    |                    |           |
| CD11b <sup>+</sup> Ly6C <sup>lo</sup>                         |                                                              |                    |                    |           |



|              |                                                                                                                                                                                                                              |                    |                    |           |
|--------------|------------------------------------------------------------------------------------------------------------------------------------------------------------------------------------------------------------------------------|--------------------|--------------------|-----------|
|              | <b>Neutrophils</b>                                                                                                                                                                                                           |                    |                    |           |
|              | CD45 <sup>+</sup> TCR $\gamma$ / $\delta$ <sup>-</sup><br>NK1.1 <sup>-</sup> TCR $\beta$ <sup>-</sup> B220 <sup>-</sup><br>Ly-6G <sup>+</sup> Ly-6C <sup>+</sup>                                                             | 30.140 $\pm$ 2.855 | 34.960 $\pm$ 3.418 | 0.0952    |
| <b>Blood</b> | <b><math>\gamma\delta</math> T cells</b>                                                                                                                                                                                     |                    |                    |           |
|              | CD45 <sup>+</sup> TCR $\beta$ <sup>-</sup><br>TCR $\gamma$ / $\delta$ <sup>+</sup>                                                                                                                                           | 0.808 $\pm$ 0.213  | 1.386 $\pm$ 0.232  | ** 0.0079 |
|              | <b>NK cells</b>                                                                                                                                                                                                              |                    |                    |           |
|              | CD45 <sup>+</sup> TCR $\gamma$ / $\delta$ <sup>-</sup><br>TCR $\beta$ <sup>-</sup> NK1.1 <sup>+</sup>                                                                                                                        | 11.960 $\pm$ 4.377 | 11.580 $\pm$ 2.536 | 0.8968    |
|              | <b>CD4<sup>+</sup> T cells</b>                                                                                                                                                                                               |                    |                    |           |
|              | CD45 <sup>+</sup> TCR $\gamma$ / $\delta$ <sup>-</sup><br>NK1.1 <sup>-</sup> TCR $\beta$ <sup>+</sup> CD8 <sup>-</sup><br>CD4 <sup>+</sup>                                                                                   | 16.330 $\pm$ 4.123 | 17.480 $\pm$ 1.219 | 0.9683    |
|              | <b>CD8<sup>+</sup> T cells</b>                                                                                                                                                                                               |                    |                    |           |
|              | CD45 <sup>+</sup> TCR $\gamma$ / $\delta$ <sup>-</sup><br>NK1.1 <sup>-</sup> TCR $\beta$ <sup>+</sup> CD4 <sup>-</sup><br>CD8 <sup>+</sup>                                                                                   | 13.220 $\pm$ 2.435 | 15.640 $\pm$ 1.682 | 0.1349    |
|              | <b>B cells</b>                                                                                                                                                                                                               |                    |                    |           |
|              | CD45 <sup>+</sup> TCR $\gamma$ / $\delta$ <sup>-</sup><br>NK1.1 <sup>-</sup> TCR $\beta$ <sup>-</sup> B220 <sup>+</sup>                                                                                                      | 36.200 $\pm$ 4.047 | 34.260 $\pm$ 2.882 | 0.4206    |
|              | <b>Macrophages</b>                                                                                                                                                                                                           |                    |                    |           |
|              | CD45 <sup>+</sup> TCR $\gamma$ / $\delta$ <sup>-</sup><br>NK1.1 <sup>-</sup> TCR $\beta$ <sup>-</sup> B220 <sup>-</sup><br>CD64 <sup>+</sup>                                                                                 | 2.068 $\pm$ 0.262  | 3.876 $\pm$ 0.358  | ** 0.0079 |
|              | <b>Neutrophils</b>                                                                                                                                                                                                           |                    |                    |           |
|              | CD45 <sup>+</sup> TCR $\gamma$ / $\delta$ <sup>-</sup><br>NK1.1 <sup>-</sup> TCR $\beta$ <sup>-</sup> B220 <sup>-</sup><br>CD64 <sup>-</sup> CD11c <sup>-</sup> Ly-<br>6G <sup>+</sup> Ly-6C <sup>+</sup>                    | 3.740 $\pm$ 2.980  | 2.492 $\pm$ 0.854  | 0.8413    |
|              | <b>Monocytes</b>                                                                                                                                                                                                             |                    |                    |           |
|              | CD45 <sup>+</sup> TCR $\gamma$ / $\delta$ <sup>-</sup><br>NK1.1 <sup>-</sup> TCR $\beta$ <sup>-</sup> B220 <sup>-</sup><br>CD64 <sup>-</sup> CD11c <sup>-</sup> Ly-<br>6G <sup>-</sup> CD11b <sup>+</sup> Ly-6C <sup>+</sup> | 0.095 $\pm$ 0.028  | 0.184 $\pm$ 0.031  | ** 0.0079 |

*n* = 4 or 5 mice per group. Data obtained from one experiment. Values represent the mean frequency of each cell subset as a % of CD45<sup>+</sup> cells  $\pm$  standard deviation (SD). Statistical significance was determined using a Mann–Whitney test. \* *p* < 0.05, \*\* *p* < 0.01. cDCs, conventional dendritic cells; NK, natural killer; WT, wild-type.

**Supplementary Table 7. Antibodies used for flow cytometry, polarization cocktails, and immunofluorescence microscopy**

| <b>Antibody</b>                             | <b>Company</b>               | <b>Clone</b> | <b>Use</b> | <b>Concentration</b>           |
|---------------------------------------------|------------------------------|--------------|------------|--------------------------------|
| Alexa Fluor 488 anti-mouse F4/80            | BioLegend*                   | BM8          | FC         | 10 µg/ml                       |
| Alexa Fluor 488 anti-mouse FOXP3            | BioLegend*                   | MF-14        | FC         | 10 µg/ml                       |
| Alexa Fluor 647 anti-mouse CD4              | BioLegend*                   | RM4-5        | IF         | 5 µg/ml                        |
| Alexa Fluor 647 anti-mouse CD107a (LAMP1)   | BioLegend*                   | 1D4B         | FC         | 2.5 µg/ml (lung)<br>or 5 µg/ml |
|                                             |                              |              | IF         | 5 µg/ml                        |
| Alexa Fluor 647 anti-mouse FOXP3            | BioLegend*                   | MF-14        | FC         | 10 µg/ml                       |
| Alexa Fluor 647 anti-mouse IFN $\gamma$     | BioLegend*                   | XMG1.2       | FC         | 10 µg/ml                       |
| Alexa Fluor 700 anti-mouse CD8 $\alpha$     | BioLegend*                   | 53-6.7       | FC         | 2.5 µg/ml                      |
| Alexa Fluor 700 anti-mouse/human CD44       | BioLegend*                   | IM7          | CS         | 2.5 µg/ml                      |
| Alexa Fluor 700 anti-mouse CD45.1           | BioLegend*                   | A20          | FC         | 5 µg/ml                        |
| APC anti-mouse CD4                          | BioLegend*                   | GK1.5        | FC         | 1 µg/ml                        |
|                                             |                              |              | CS         | 2 µg/ml                        |
| APC anti-mouse CD11a                        | BD Biosciences <sup>%</sup>  | 2D7          | FC         | 1 µg/ml                        |
| CD27 monoclonal antibody, APC               | eBioscience <sup>#</sup>     | LG.7F9       | FC         | 1 µg/ml                        |
| APC anti-mouse IFN- $\gamma$                | BioLegend*                   | XMG1.2       | FC         | 4 µg/ml                        |
| APC anti-mouse IL-10                        | BioLegend*                   | JES5-16E3    | FC         | 1 µg/ml                        |
| APC anti-mouse TCR $\beta$ chain            | BioLegend*                   | H57-597      | FC         | 1 µg/ml                        |
| APC anti-mouse TCR $\gamma/\delta$          | BioLegend*                   | GL3          | FC         | 2 µg/ml                        |
| CD45.2 monoclonal antibody, APC-eFluor 780  | eBioscience <sup>#</sup>     | 104          | FC         | 0.5 µg/ml                      |
| APC/Cy7 anti-mouse NK1.1                    | BioLegend*                   | PK136        | FC         | 1 µg/ml                        |
| Biotin anti-mouse CD314 (NKG2D)             | Miltenyi Biotec <sup>^</sup> | CX5          | FC         | 0.15 µg/ml                     |
| Biotin mouse anti-mouse H-2Kb               | BD Biosciences <sup>%</sup>  | AF6-88.5     | FC         | 2.5 µg/ml                      |
| BUV395 rat anti-mouse CD4                   | BD Biosciences <sup>%</sup>  | GK1.5        | FC         | 1 µg/ml                        |
| BUV395 mouse anti-mouse CD45.2              | BD Biosciences <sup>%</sup>  | 104          | FC         | 1 µg/ml                        |
| BUV737 hamster anti-mouse TCR $\beta$ chain | BD Biosciences <sup>%</sup>  | H57-597      | FC         | 1 µg/ml                        |

|                                                  |                             |                    |          |                    |
|--------------------------------------------------|-----------------------------|--------------------|----------|--------------------|
| Brilliant Violet 421 anti-mouse CD279 (PD-1)     | BioLegend*                  | 29F.1A12           | FC       | 5 µg/ml            |
| Brilliant Violet 421 anti-mouse/human CD11b      | BioLegend*                  | M1/70              | FC       | 10 µg/ml           |
| CD335 (NKp46) monoclonal antibody, eFluor 450    | eBioscience <sup>#</sup>    | 29A1.4             | FC       | 2 µg/ml            |
| Brilliant Violet 421 anti-mouse F4/80            | BioLegend*                  | BM8                | FC       | 2 µg/ml            |
| Brilliant Violet 421 anti-mouse FOXP3            | BioLegend*                  | MF-14              | FC       | 4 µg/ml            |
| Brilliant Violet 605 anti-mouse CD4              | BioLegend*                  | GK1.5              | FC<br>CS | 1 µg/ml<br>1 µg/ml |
| Brilliant Violet 605 anti-mouse CD4              | BioLegend*                  | RM4-5              | FC<br>CS | 1 µg/ml<br>1 µg/ml |
| Brilliant Violet 605 anti-mouse NK1.1            | BD Biosciences <sup>%</sup> | PK136              | FC       | 1 µg/ml            |
| Brilliant Violet 605 anti-mouse Ly-6C            | BioLegend*                  | HK1.4              | FC       | 10 µg/ml           |
| Brilliant Violet 650 anti-mouse/human CD11b      | BioLegend*                  | M1/70              | FC       | 0.25 µg/ml         |
| Brilliant Violet 650 anti-mouse/human CD45R/B220 | BioLegend*                  | RA3-6B2            | FC       | 10 µg/ml           |
| Brilliant Violet 650 rat anti-mouse IFN $\gamma$ | BD Biosciences <sup>%</sup> | XMG1.2             | FC       | 2 µg/ml            |
| Brilliant Violet 650 anti-mouse TNF $\alpha$     | BioLegend*                  | MP6-XT22           | FC       | 2 µg/ml            |
| Brilliant Violet 711 anti-mouse CD45.2           | BioLegend*                  | 104                | FC       | 2 µg/ml            |
| Brilliant Violet 785 anti-mouse CD11c            | BioLegend*                  | N418               | FC       | 2.9 µg/ml          |
| Brilliant Violet 785 anti-mouse CD223 (LAG3)     | BioLegend*                  | C9B7W              | FC       | 4 µg/ml            |
| T-bet monoclonal antibody, eFluor 660            | eBioscience <sup>#</sup>    | eBio4B10<br>(4B10) | FC       | 4 µg/ml            |
| FITC anti-mouse CD4                              | BioLegend*                  | GK1.5              | FC       | 2.5 µg/ml          |
| FITC anti-mouse CD8a                             | BioLegend*                  | 53-6.7             | FC       | 2.5 µg/ml          |
| FITC anti-mouse CD11a                            | BioLegend*                  | M17/4              | FC       | 10 µg/ml           |
| FITC anti-mouse CD45.1                           | BioLegend*                  | A20                | FC       | 5 µg/ml            |

|                                                 |                             |             |     |             |
|-------------------------------------------------|-----------------------------|-------------|-----|-------------|
| FITC anti-mouse CD45.2                          | BioLegend*                  | 104         | FC  | 2.5 µg/ml   |
| FITC anti-mouse TCR β chain                     | BioLegend*                  | H57-597     | FC  | 2.5 µg/ml   |
| LEAF™ Purified anti-mouse CD28                  | BioLegend*                  | 37.51       | IVP | 2 µg/ml     |
| LEAF™ Purified anti-mouse IFN-gamma             | BioLegend*                  | XMG1.2      | IVP | 10 µg/ml    |
| LEAF™ Purified anti-mouse IL-4                  | BioLegend*                  | 11B11       | IVP | 10 µg/ml    |
| Pacific Blue anti-human/mouse Granzyme B        | BioLegend*                  | GB11        | FC  | 1 µl/sample |
| Pacific Blue anti-mouse I-A/I-E                 | BioLegend*                  | M5/114.15.2 | FC  | 1.25 µg/ml  |
| PE anti-mouse CD8a                              | BioLegend*                  | 53-6.7      | FC  | 1 µg/ml     |
| PE anti-mouse CD62L                             | BioLegend*                  | MEL-14      | CS  | 1 µg/ml     |
| PE anti-mouse CD226 (DNAM-1)                    | BioLegend*                  | 480.1       | FC  | 1 µg/ml     |
| PE anti-mouse Granzyme B                        | eBioscience <sup>#</sup>    | GB11        | FC  | 0.06 µg/ml  |
| Granzyme B Monoclonal Antibody, PE              | Invitrogen <sup>&amp;</sup> | GB11        | FC  | 1 µl/sample |
| PE anti-mouse I-A/I-E                           | BioLegend*                  | M5/114.15.2 | FC  | 0.4 µg/ml   |
| PE anti-mouse IL-10                             | BioLegend*                  | JES5-16E3   | FC  | 2 µg/ml     |
| PE anti-mouse Perforin                          | BioLegend*                  | S16009B     | FC  | 2 µg/ml     |
| Mouse Rae-1 Pan Specific PE-conjugated antibody | R&D Systems <sup>@</sup>    | 186107      | FC  | 5 µl/sample |
| PE Mouse Anti-Stat3 (pY705)                     | BD Biosciences <sup>%</sup> | 4/P-STAT3   | FC  | 1 µl/sample |
| PE Mouse Anti-Stat4 (pY693)                     | BD Biosciences <sup>%</sup> | 38/p-Stat4  | FC  | 1 µl/sample |
| PE/Cy7 anti-human/mouse/rat CD278 (ICOS)        | BioLegend*                  | C398.4A     | FC  | 4 µg/ml     |
| PE/Cy7 anti-mouse CD8α                          | BioLegend*                  | 53-6.7      | FC  | 1 µg/ml     |
| PE/Cy7 anti-mouse CD25                          | BioLegend*                  | PC61        | CS  | 1 µg/ml     |
| PE/Cy7 anti-mouse CD49d                         | BioLegend*                  | R1-2        | FC  | 4 µg/ml     |
| PE/Cy7 anti-mouse F4/80                         | BioLegend*                  | BM8         | FC  | 4 µg/ml     |
| PE/Cy7 anti-mouse IFNγ                          | BioLegend*                  | XMG1.2      | FC  | 1 µg/ml     |
| PE/Cy7 anti-mouse Ly-6G                         | BioLegend*                  | 1A8         | FC  | 1 µg/ml     |

|                                        |                             |           |     |            |
|----------------------------------------|-----------------------------|-----------|-----|------------|
| NK1.1 monoclonal antibody, PE-Cyanine7 | eBioscience <sup>#</sup>    | PK136     | FC  | 1 µg/ml    |
| PE/Cy7 anti-T-bet antibody             | BioLegend <sup>*</sup>      | 4B10      | FC  | 4 µg/ml    |
| PE/Dazzle 594 anti-mouse CD64 (FcγRI)  | BioLegend <sup>*</sup>      | X54-5.71  | FC  | 1 µg/ml    |
| PE/Dazzle 594 anti-mouse CD152         | BioLegend <sup>*</sup>      | UC10-4B9  | FC  | 1 µg/ml    |
| PE/Dazzle 594 IFNγ                     | BioLegend <sup>*</sup>      | XMG1.2    | FC  | 1 µg/ml    |
| PE/Dazzle 594 anti-mouse IL-10         | BioLegend <sup>*</sup>      | JES5-16E3 | FC  | 4 µg/ml    |
| PerCP/Cy5.5 anti-mouse CD8α            | BioLegend <sup>*</sup>      | 53-6.7    | FC  | 1 µg/ml    |
| PerCP/Cy5.5 anti-mouse CD11a/CD18      | BioLegend <sup>*</sup>      | LFA-1     | FC  | 1 µg/ml    |
| PerCP/Cy5.5 anti-mouse/human CD11b     | BioLegend <sup>*</sup>      | M1/70     | FC  | 1 µg/ml    |
| PerCP/Cy5.5 rat anti-mouse CD38        | BD Biosciences <sup>%</sup> | 90/CD38   | FC  | 4 µg/ml    |
| PerCP/Cy5.5 anti-mouse CD90.2          | BioLegend <sup>*</sup>      | 30-H12    | CS  | 2 µg/ml    |
| PerCP/Cy5.5 anti-mouse TCRβ            | BioLegend <sup>*</sup>      | H57-597   | FC  | 0.5 µg/ml  |
| TruStain fcX™ (anti-mouse CD16/32)     | BioLegend <sup>*</sup>      | 93        | FC  | 1.25 µg/ml |
| Ultra-LEAF™ Purified anti-mouse CD3ε   | BioLegend <sup>*</sup>      | 145-2C11  | IVP | 4 µg/ml    |

<sup>\*</sup>BioLegend, San Diego CA, USA; <sup>#</sup>eBioscience, Thermo Fisher Scientific, Waltham MA, USA;

<sup>%</sup>BD Biosciences, San Jose CA, USA; <sup>^</sup>Miltenyi Biotec, Bergisch Gladbach, Germany;

<sup>&</sup>Invitrogen, Carlsbad CA, USA; <sup>@</sup>R&D Systems, Minneapolis MN, USA; FC, flow cytometry; IF, immunofluorescence; CS, fluorescence-activated cell sorting; IVP, in vitro polarization
